# Supplementary material
Source: Springer Nature journal article supplement (https://www.springermedizin.de/resource/supplementary/13550_2013_180_MOESM4_ESM.pdf/9687764)

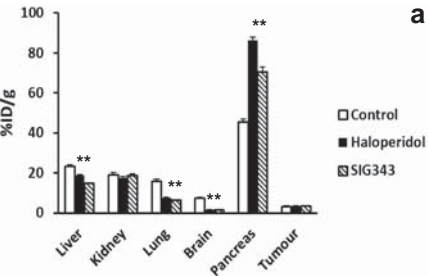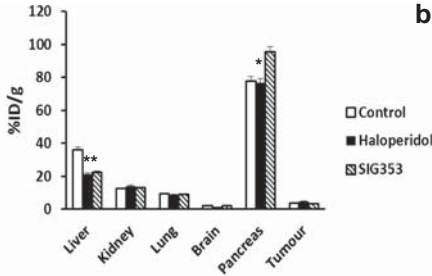

Supplement: MOESM4 [file 9687764]
